# Supplementary material for: Rockpool Gobies Change Colour for Camouflage
Source: PLoS One. 2014 Oct 15;9(10):e110325. doi: 10.1371/journal.pone.0110325 (PMC4198244; doi:10.1371/journal.pone.0110325)
Supplement: Data S1 — Experimental data. (XLSX) [file pone.0110325.s001.xlsx]

## Sheet: Exp 1 peafowl
					fish						Background
Individual ID	Background	Size mm	Block	Time	Dbl	Lw	Mw	Sw	Vs			Dbl	Lw	Mw	Sw	Vs
2	Black	66	1	0	14.2799	16.5587	13.3156	8.91558	14.114		Grey	17.7497	15.7955	18.4914	18.2319	24.2012
4	Black	70	2	0	11.3297	9.35216	13.6994	10.162	9.06825		Grey	16.8884	14.1809	19.2722	17.7929	15.8312
6	Black	39	3	0	10.6223	8.78114	12.6521	9.92207	11.0176		Grey	12.6931	10.0683	14.8128	13.7434	14.0743
8	Black	45	4	0	8.66485	6.93093	10.6779	8.35243	8.78916		Grey	16.4889	12.9488	18.9713	18.6009	17.8455
10	Black	38	5	0	14.7226	12.318	17.1385	14.6034	13.5594		Grey	19.7667	16.3797	22.1657	22.4287	20.3437
12	Black	36	6	0	14.2094	14.0081	15.5458	11.6284	11.1743		Grey	16.2779	14.0389	18.1421	17.0681	16.3455
14	Black	70	7	0	12.2652	11.7548	13.374	9.63401	11.1168		Grey	14.9452	12.9318	16.5008	15.5343	16.5067
16	Black	40	8	0	10.9538	9.93198	12.1352	9.12601	10.4665		Grey	15.1883	12.9157	16.9521	15.5056	16.0744
18	Black	38	9	0	9.71989	9.40186	10.4184	7.31533	10.8393		Grey	14.4597	12.2293	15.765	15.0145	18.0586
20	Black	36	10	0	5.82962	5.01443	6.76735	4.05848	8.14206		Grey	15.1733	13.2852	16.3019	15.4163	18.4865
22	Black	33	11	0	13.2699	13.7504	13.6906	10.1858	12.3167		Grey	17.8635	16.2076	19.2143	17.8836	18.7869
24	Black	41	12	0	5.84108	5.6299	6.35456	3.8123	8.96891		Grey	14.6702	13.0356	15.608	14.7556	18.7124
26	Black	39	13	0	15.1279	14.4002	16.0653	13.4518	15.346		Grey	9.45337	7.58831	10.9417	8.85914	11.0832
28	Black	37	14	0	8.28785	7.10313	9.75295	7.0439	9.71971		Grey	15.7219	14.3502	16.8854	15.001	17.1486
30	Black	30	15	0	9.87502	8.55718	11.6516	8.30853	9.00717		Grey	15.5867	13.133	17.2685	16.7548	17.9742
32	Black	75	16	0	7.80213	6.22978	9.72323	6.91758	8.00607		Grey	16.592	13.5682	18.6689	18.5448	18.3598
34	Black	38	17	0	15.2531	13.8851	17.0746	13.1024	13.1257		Grey	19.7806	17.0468	21.7666	21.1611	20.2035
36	Black	33	18	0	10.603	8.96761	12.2995	10.0692	11.2812		Grey	14.1626	11.4264	16.0878	15.4682	16.0317
38	Black	68	19	0	12.6493	12.0898	13.6334	10.2765	12.7699		Grey	14.1384	12.0056	15.633	14.7335	17.1084
40	Black	40	20	0	11.0568	10.6915	11.9945	8.64974	11.0407		Grey	12.3095	9.89696	14	13.268	15.2955
1	White	62	1	0	13.6866	15.3125	12.8473	9.10921	14.9578		Grey	15.0494	12.9521	15.8289	15.2099	21.6715
3	White	70	2	0	11.2985	8.71235	13.9544	10.9245	9.65785		Grey	18.192	14.2938	20.7802	21.4743	19.4919
5	White	35	3	0	11.2592	9.87429	12.9985	10.1043	11.4807		Grey	13.9648	11.2904	16.0779	15.1071	15.8355
7	White	49	4	0	10.2518	8.27602	12.4847	9.68636	9.16559		Grey	18.1674	14.9619	20.479	20.1848	20.672
9	White	30	5	0	15.9827	15.7918	16.94	13.229	14.947		Grey	15.3521	13.6254	16.9007	14.7341	16.452
11	White	39	6	0	14.4937	15.0384	14.6169	11.6654	15.4892		Grey	17.5952	15.0228	18.9945	18.6	21.9615
13	White	63	7	0	8.11201	7.44455	9.28013	5.85553	8.29099		Grey	14.1695	11.6791	15.9178	14.5637	15.9661
15	White	43	8	0	6.7509	6.30899	7.66342	4.70365	8.12217		Grey	13.2302	10.8063	14.9076	13.6349	15.3974
17	White	37	9	0	20.1094	20.8536	21.2437	15.5493	14.6106		Grey	18.3597	16.5393	20.0122	18.5764	18.1243
19	White	40	10	0	8.94639	8.60551	9.66193	6.50234	10.0533		Grey	12.6915	11.1038	13.7491	12.453	15.8198
21	White	35	11	0	11.6488	11.0247	12.6729	9.09347	11.3503		Grey	14.431	12.4665	15.7074	14.77	17.3498
23	White	45	12	0	13.2085	13.2639	13.8266	10.6298	12.6929		Grey	16.5006	14.773	17.8599	16.0253	17.4907
25	White	36	13	0	13.7346	12.9567	14.991	11.1785	12.3312		Grey	17.1607	14.768	18.7357	18.7593	19.6659
27	White	41	14	0	10.9519	10.8123	11.5677	8.8271	12.1798		Grey	12.6064	11.0878	13.5818	12.9461	16.5301
29	White	32	15	0	15.4185	15.6251	15.9322	11.9323	14.7991		Grey	18.7432	16.5698	19.9232	19.8174	23.3359
31	White	70	16	0	7.80738	6.32888	9.66459	6.76032	7.8292		Grey	10.4298	7.84206	12.4435	11.2323	11.9345
33	White	34	17	0	9.38835	8.1735	10.751	8.22806	10.4522		Grey	12.6992	10.2432	14.3555	13.6512	15.4754
35	White	31	18	0	9.84616	9.28872	10.9443	7.2983	9.44066		Grey	13.5885	11.5879	15.1432	13.7678	15.3159
37	White	75	19	0	9.37838	7.8614	11.3106	8.12016	8.64722		Grey	12.9118	10.0132	15.284	14.0025	13.9364
39	White	52	20	0	8.42177	7.17636	9.91447	7.37779	9.47899		Grey	11.1083	8.55285	12.8879	12.4001	14.1448
2	Black	66	1	1	6.68186	6.91312	6.90376	4.11411	9.21608		Black	5.73933	5.02451	6.06277	4.02366	9.46135
4	Black	70	2	1	8.23428	5.38848	11.2033	8.33728	7.11229		Black	9.21734	6.12367	12.037	10.1042	8.84075
6	Black	39	3	1	5.49739	3.40508	7.69439	5.18783	6.41825		Black	5.52848	3.24919	7.77475	5.33388	6.68131
8	Black	45	4	1	4.96322	3.32748	7.12873	4.02866	5.35699		Black	5.26577	3.43838	7.71438	4.83373	5.94638
10	Black	38	5	1	15.5998	15.3823	16.2093	13.3846	15.737		Black	15.7396	15.631	16.2654	13.2916	15.6086
12	Black	36	6	1	18.5425	19.1612	18.3954	14.7781	18.317		Black	18.5009	19.0422	18.3053	14.9024	18.5152
14	Black	70	7	1	4.74297	3.30151	6.62084	3.64011	5.36093		Black	4.54697	3.01026	6.1759	3.4569	5.43147
16	Black	40	8	1	4.62085	3.60869	5.40817	2.83337	7.13289		Black	4.84494	3.51326	5.47468	2.84631	7.28101
18	Black	38	9	1	2.82259	1.85232	4.38244	1.14883	4.64562		Black	2.90685	1.1231	4.04971	1.02498	4.68098
20	Black	36	10	1	15.9725	16.3044	16.1702	12.351	14.7097		Black	16.1158	16.4065	16.4038	12.9547	15.3409
22	Black	33	11	1	3.24261	1.75126	4.57736	1.51092	4.9464		Black	2.91862	4.16955	1.18947	1.18947	4.95199
24	Black	41	12	1	2.94573	2.03846	3.00502	0.963884	7.02135		Black	3.57454	2.77424	3.64023	1.64549	7.85527
26	Black	39	13	1	5.65629	3.59216	7.92491	5.3571	6.56044		Black	5.94037	4.49814	7.79739	4.75717	7.11108
28	Black	37	14	1	6.09841	4.516	8.02057	5.20131	7.21454		Black	4.82167	2.85883	7.12063	4.66566	5.97953
30	Black	30	15	1	6.41865	4.31894	8.68261	5.80482	6.85729		Black	6.08923	4.53005	7.99011	5.16182	7.2347
32	Black	75	16	1	5.30451	3.47203	7.28992	4.22958	6.09529		Black	6.11791	4.04728	8.32986	5.50752	6.65022
34	Black	38	17	1	7.58269	5.76968	9.58023	6.54207	8.02081		Black	6.23958	5.04704	8.17825	5.22936	7.41401
36	Black	33	18	1	4.22607	2.50315	6.53044	3.76828	5.52797		Black	5.41903	3.31093	7.67683	5.13645	6.39975
38	Black	68	19	1	4.90198	3.40855	6.97892	3.76278	5.71271		Black	4.25431	2.88448	6.1249	3.1551	5.8232
40	Black	40	20	1	7.12862	5.45681	9.11996	5.81859	6.98815		Black	6.59795	4.91395	8.62171	5.56651	6.9877
1	White	62	1	1	36.3851	43.6864	33.7369	24.4235	24.9949		White	185.699	190.87	184.66	167.877	167.75
3	White	70	2	1	19.2178	18.3551	21.0926	16.4459	14.2599		White	108.041	109.012	108.475	100.342	91.467
5	White	35	3	1	20.034	20.4796	21.4532	16.5208	13.8637		White	97.1313	96.025	98.3771	92.6252	82.2417
7	White	49	4	1	13.0859	11.7703	14.9856	11.5044	10.8823		White	126.511	129.114	126.223	115.882	104.714
9	White	30	5	1	19.354	21.7452	18.6019	13.5394	17.4487		White	100.287	100.316	100.888	95.0072	88.8507
11	White	39	6	1	20.9588	21.4047	22.271	17.623	15.5442		White	104.102	104.274	105.068	97.69	83.3456
13	White	63	7	1	13.9471	14.4084	15.2434	9.24344	8.6222		White	113.294	115.072	113.334	103.221	95.1476
15	White	43	8	1	19.7054	21.9366	20.1952	13.419	12.7449		White	131.994	133.975	132.019	121.791	107.511
17	White	37	9	1	27.34	31.2386	27.0708	17.8551	16.2214		White	139.297	142.857	138.786	125.136	110.273
19	White	40	10	1	11.8818	11.5983	12.8651	8.12819	9.90978		White	108.501	109.707	108.726	99.4097	91.2621
21	White	35	11	1	23.8349	27.2767	23.3811	15.3443	15.1055		White	132.653	136.864	131.863	117.987	104.644
23	White	45	12	1	15.4708	18.9055	14.4359	8.99116	12.1901		White	97.4273	98.151	98.2079	88.2117	77.2409
25	White	36	13	1	18.179	18.9895	18.8712	13.4901	13.434		White	93.154	95.0647	93.7769	82.4407	68.6414
27	White	41	14	1	17.6452	18.6712	18.3433	13.1129	12.7598		White	113.013	114.656	113.434	102.327	87.7508
29	White	32	15	1	25.2018	28.1066	25.5823	16.9137	14.2366		White	84.1423	85.5157	84.9688	75.3343	61.6715
31	White	70	16	1	12.4132	12.6909	13.2583	8.38491	9.70048		White	99.2146	100.623	99.6611	90.2997	78.0853
33	White	34	17	1	14.5923	14.6906	15.7766	10.1312	10.1567		White	82.0747	82.7594	83.3804	72.359	58.5745
35	White	31	18	1	20.0889	21.5264	20.7718	14.138	12.8005		White	87.8938	88.507	88.8429	79.8018	66.7782
37	White	75	19	1	12.7352	13.1727	13.1751	8.98956	11.8939		White	78.9436	77.8196	80.4974	73.9254	63.8469
39	White	52	20	1	21.4917	22.9304	21.7273	16.6467	17.3858		White	106.359	107.438	106.923	96.6949	85.4405
2	Black	66	1	10	8.21262	8.97759	7.36743	5.02783	12.6919
4	Black	70	2	10	8.74885	6.15189	11.5054	8.41578	7.75044
6	Black	39	3	10	5.56393	2.99402	8.34948	5.44848	5.60447
8	Black	45	4	10	9.25013	7.06723	11.7044	8.99782	8.53406
10	Black	38	5	10	9.57343	8.75885	10.4527	7.77213	12.1482
12	Black	36	6	10	18.0244	18.8357	18.7468	14.3151	15.7502
14	Black	70	7	10	3.79354	2.35794	5.30003	2.00797	4.87215
16	Black	40	8	10	7.65191	7.68129	7.91664	5.16772	10.1747
18	Black	38	9	10	2.19905	1.43301	3.56547	0.654982	4.31543
20	Black	36	10	10	3.64977	3.09735	4.35699	2.05058	6.93746
22	Black	33	11	10	3.48687	2.85025	4.38208	2.03111	6.41002
24	Black	41	12	10	4.74895	4.96121	4.95814	2.46345	8.40576
26	Black	39	13	10	6.85892	5.5187	7.94276	5.50952	9.3916
28	Black	37	14	10	3.95989	1.64217	6.79111	3.98397	4.27006
30	Black	30	15	10	5.15257	2.94429	7.59101	4.84514	5.96006
32	Black	75	16	10	4.18075	2.59444	6.09333	3.4028	5.53409
34	Black	38	17	10	5.7371	4.02426	7.67058	5.18238	7.07483
36	Black	33	18	10	4.29027	2.27966	6.72963	3.99136	5.28119
38	Black	68	19	10	4.9659	3.29252	6.75943	4.33346	6.37864
40	Black	40	20	10	5.22884	3.39928	7.82046	4.934	5.8763
1	White	62	1	10	30.0912	36.5252	26.9936	20.0634	25.2731
3	White	70	2	10	19.1185	18.7937	20.8168	15.5258	13.571
5	White	35	3	10	20.8958	23.042	21.3608	15.2546	13.953
7	White	49	4	10	14.0214	11.9644	16.2965	13.6847	12.4291
9	White	30	5	10	16.489	15.9994	18.2027	13.7843	12.5974
11	White	39	6	10	16.963	17.3413	17.7941	13.812	14.2656
13	White	63	7	10	13.8293	14.8739	14.4114	8.57236	9.61932
15	White	43	8	10	16.4042	18.61	16.2169	10.7152	12.7959
17	White	37	9	10	22.43	25.1355	22.768	14.9155	13.2999
19	White	40	10	10	22.9152	23.915	23.6358	16.2231	15.8979
21	White	35	11	10	18.1376	20.1859	18.0725	11.9602	13.3515
23	White	45	12	10	14.2763	16.8581	13.5654	8.57801	11.9206
25	White	36	13	10	20.5544	21.7607	21.1877	15.1089	14.6077
27	White	41	14	10	17.5596	18.3875	18.319	13.1315	13.3674
29	White	32	15	10	21.0745	23.1474	21.5734	14.5274	13.0544
31	White	70	16	10	13.4728	13.339	14.7251	9.63245	10.0786
33	White	34	17	10	16.157	16.0834	17.5617	11.6977	10.9504
35	White	31	18	10	20.932	22.8167	21.2503	14.5813	13.9508
37	White	75	19	10	14.5265	15.0351	15.0948	10.2304	12.381
39	White	52	20	10	25.1911	27.4766	25.8971	18.464	15.4856
2	Black	66	1	60	8.51253	7.01591	10.2071	7.30846	8.79545
4	Black	70	2	60	5.86255	3.71795	8.53297	5.69699	6.18899
6	Black	39	3	60	8.59256	6.79437	10.6523	7.68374	8.77877
8	Black	45	4	60	8.45549	7.05995	10.2979	7.63983	9.21625
10	Black	38	5	60	11.7836	10.5628	13.1495	10.01	11.2906
12	Black	36	6	60	7.63536	6.63015	9.05419	6.05253	8.67048
14	Black	70	7	60	3.7957	2.80217	5.02831	2.04247	5.52464
16	Black	40	8	60	5.54886	4.69388	6.9509	4.06435	7.41336
18	Black	38	9	60	2.99825	1.76733	3.45218	1.11739	5.86714
20	Black	36	10	60	4.95869	4.133	5.31111	2.71564	7.96114
22	Black	33	11	60	2.92892	2.49848	3.1493	0.942234	6.57233
24	Black	41	12	60	4.08717	2.65541	4.9925	2.3252	6.52616
26	Black	39	13	60	5.67263	3.84769	6.95634	4.27277	7.24815
28	Black	37	14	60	5.25567	3.55295	6.92534	4.13515	6.61195
30	Black	30	15	60	4.19392	2.55261	6.55725	3.89076	5.01668
32	Black	75	16	60	5.58601	4.09637	7.20494	4.68055	7.36753
34	Black	38	17	60	8.09898	6.09452	9.9727	7.69818	9.5996
36	Black	33	18	60	5.18388	3.16801	7.91037	5.01444	5.69601
38	Black	68	19	60	5.24732	3.16644	8.01649	4.77335	5.1653
40	Black	40	20	60	4.19169	2.67915	6.49127	3.42351	5.55039
1	White	62	1	60	30.7971	33.3675	31.0459	23.3462	20.4789
3	White	70	2	60	24.0432	26.3007	24.5086	17.1739	15.3884
5	White	35	3	60	21.6627	23.3938	22.6477	15.6483	13.078
7	White	49	4	60	12.6635	10.8199	14.5914	12.4844	12.7386
9	White	30	5	60	16.7398	17.9545	16.6252	12.8516	15.9638
11	White	39	6	60	17.2985	18.7463	17.111	12.9465	16.0653
13	White	63	7	60	17.7493	19.4643	18.0078	11.4433	12.1283
15	White	43	8	60	22.5736	26.4889	21.8215	14.5405	15.26
17	White	37	9	60	14.5085	15.2296	15.0322	10.2621	11.9601
19	White	40	10	60	22.2655	24.6676	21.4456	15.0286	18.5301
21	White	35	11	60	19.1261	20.7045	19.2448	13.2882	14.936
23	White	45	12	60	19.2655	22.9488	18.0478	12.2379	15.2458
25	White	36	13	60	31.5841	32.9328	32.7845	24.392	19.9461
27	White	41	14	60	13.8239	13.8502	14.9425	10.377	10.9891
29	White	32	15	60	20.2017	21.4493	20.9044	14.4855	13.4814
31	White	70	16	60	16.9509	17.0176	18.4343	12.5898	11.2188
33	White	34	17	60	16.9728	16.9611	18.4231	12.4018	11.7317
35	White	31	18	60	31.7934	35.5237	30.9682	22.6286	22.2402
37	White	75	19	60	15.6808	15.5321	17.4927	11.3542	10.1808
39	White	52	20	60	18.1929	19.7182	19.0477	12.4358	11.2572

## Sheet: Exp 2 peafowl
					FISH						Background
Individual ID	Background	Size	Block	Time	vs	sw	mw	lw	dbl		Type	vs	sw	mw	lw	dbl
1	Blue	4.5	1	0	13.151	15.119	20.914	17.9	18.848		Grey	35.528	39.121	35.136	28.856	33.134
3	Blue	5	2	0	14.255	15.84	21.412	17.364	19.005		Grey	17.716	19.661	21.086	16.343	18.946
5	Blue	5	3	0	21.019	24.338	28.848	28.863	27.968		Grey	25.636	29.118	31.745	29.853	30.53
7	Blue	4.5	4	0	21.693	25.283	30.442	30.08	29.328		Grey	26.278	30.464	32.999	30.74	31.688
9	Blue	5	5	0	22.515	30.33	34.448	31.138	32.162		Grey	39.31	50.329	45.649	38.736	43.301
11	Blue	5	6	0	20.689	24.607	28.454	28.241	27.474		Grey	31.546	35.702	35.934	31.615	34.2
13	Blue	10	7	0	30.765	31.198	29.977	31.164	30.142		Grey	22.412	23.236	27.566	27.779	26.876
15	Blue	4.75	8	0	37.032	43.234	48.953	51.999	49.121		Grey	38.275	44.89	49.732	51.819	49.66
17	Blue	6.5	9	0	7.503	6.785	10.358	7.137	8.548		Grey	23.29	23.607	22.781	16.82	20.574
19	Blue	7	10	0	16.678	17.862	21.935	17.57	19.594		Grey	28.295	28.845	28.367	22.75	26.216
21	Blue	7.5	11	0	19.711	26.685	31.306	27.086	28.751		Grey	33.711	41.707	41.349	35.164	38.756
23	Blue	5	12	0	8.078	10.679	14.677	8.271	11.334		Grey	9.76	12.182	14.577	7.241	11.095
25	Blue	3.5	13	0	8.741	8.039	12.042	7.218	9.528		Grey	22.911	23.143	21.93	14.921	19.358
27	Blue	6.5	14	0	10.307	9.717	12.904	9.257	10.944		Grey	26.316	26.471	24.305	17.2	21.854
29	Blue	8	15	0	16.61	19.701	23.466	17.94	20.355		Grey	23.999	27.524	26.523	20.595	23.934
31	Blue	7	16	0	15.838	14.389	19.108	18.044	17.912		Grey	17.114	17.278	17.333	12.31	15.263
33	Blue	8	17	0	24.106	32.74	37.25	30.742	33.589		Grey	29.104	36.561	35.445	26.662	31.809
35	Blue	7.5	18	0	15.65	19.23	21.199	15.497	18.2		Grey	20.131	24.119	22.952	16.163	20.027
37	Blue	7	19	0	9.409	11.332	15.894	10.695	12.911		Grey	19.95	21.955	21.005	12.718	17.762
39	Blue	8	20	0	22.789	25.601	30.087	27.735	28.404		Grey	23.774	26.252	27.306	23.088	25.35
2	Red	5	1	0	14.714	18.389	23.873	20.314	21.532		Grey	35.887	37.872	33.927	27.503	31.876
4	Red	6	2	0	13.45	14.595	18.808	16.445	17.176		Grey	20.689	24.501	25.437	20.115	23.007
6	Red	6	3	0	25.562	35.044	41.834	38.614	39.365		Grey	38.689	49.6	47.445	42.447	45.482
8	Red	6.5	4	0	20.801	23.979	28.525	28.732	27.718		Grey	25.757	29.038	31.838	29.917	30.597
10	Red	6.5	5	0	22.838	31.042	35.694	32.157	33.275		Grey	34.428	44.978	42.879	36.714	40.485
12	Red	5.5	6	0	23.156	31.764	36.615	32.879	34.075		Grey	32.651	43.095	42.029	36.557	39.699
14	Red	7	7	0	21.046	21.646	26.199	27.657	25.917		Grey	22.113	22.677	26.887	27.872	26.505
16	Red	5	8	0	20.877	21.907	26.547	27.605	26.066		Grey	23.148	24.532	28.685	28.028	27.694
18	Red	6.5	9	0	6.745	6.342	9.512	3.336	6.244		Grey	20.983	22.362	21.104	13.08	18.049
20	Red	6.5	10	0	14.683	14.596	18.753	15.337	16.763		Grey	20.597	20.653	21.283	15.72	18.958
22	Red	7	11	0	11.852	13.448	20.557	17.601	18.108		Grey	9.591	12.455	15.017	7.653	11.559
24	Red	6	12	0	14.17	17.36	22.407	16.893	19.293		Grey	17.861	20.413	20.32	13.482	17.437
26	Red	3.5	13	0	5.81	7.231	11.997	6.475	8.966		Grey	8.475	10.407	12.909	5.96	9.574
28	Red	7	14	0	11.959	16.298	18.945	11.738	15.27		Grey	43.069	45.617	36.128	25.91	33.326
30	Red	7.5	15	0	26.548	31.838	38.265	34.576	35.6		Grey	20.576	25.332	23.888	16.463	20.82
32	Red	6	16	0	17.159	20.603	22.974	16.44	19.659		Grey	28.757	31.15	29.036	21.08	25.927
34	Red	7.5	17	0	13.51	17.374	20.264	14.098	16.896		Grey	28.886	32.984	29.279	21.309	26.353
36	Red	7.5	18	0	14.501	17.317	20.296	15.068	17.485		Grey	18.782	21.345	21.328	15.258	18.696
38	Red	8	19	0	26.474	30.395	35.954	35.794	34.78		Grey	24.612	26.6	28.391	25.318	26.723
40	Red	8	20	0	15.451	19.013	21.831	15.896	18.718		Grey	29.325	32.289	28.814	21.803	26.315
1	Blue	4.5	1	1	21.636	22.62	25.021	21.504	23.388
3	Blue	5	2	1	18.312	20.689	23.149	34.424	25.964
5	Blue	5	3	1	24.571	27.151	30.071	27.382	28.589
7	Blue	4.5	4	1	20.91	24.951	27.602	24.617	25.859		Blue	84.288	83.747	39.836	12.819	35.507
9	Blue	5	5	1	13.746	15.471	19.74	16.78	17.829		Blue	90.905	95.83	47.292	13.142	41.409
11	Blue	5	6	1	19.25	20.537	23.13	19.928	21.499		Blue	81.788	81.059	41.459	18.998	38.033
13	Blue	10	7	1	17.716	17.463	15.277	7.291	12.411		Blue	70.04	73.513	37.797	18.466	35.077
15	Blue	4.75	8	1	21.319	23.899	26.364	22.544	24.513		Blue	56.211	58.48	29.639	11.363	26.45
17	Blue	6.5	9	1	12.503	11.551	14.12	8.744	11.522		Blue	82.366	81.669	38.046	11.23	33.725
19	Blue	7	10	1	13.006	15.735	18.606	12.155	15.43		Blue	50.366	47.601	17.797	0.318	14.515
21	Blue	7.5	11	1	14.278	19.438	24.172	17.359	20.561		Blue	64.909	63.616	32.362	13.618	29.207
23	Blue	5	12	1	9.33	10.429	12.945	6.898	10.02		Blue	92.195	91.593	50.589	13.816	42.913
25	Blue	3.5	13	1	9.57	12.637	15.84	7.883	12.096		Blue	64.836	70.424	31.593	5.541	27.166
27	Blue	6.5	14	1	15.78	16.299	18.563	15.248	16.855		Blue	78.582	89.857	44.607	10.3	38.425
29	Blue	8	15	1	19.863	21.735	22.984	17.309	20.542		Blue	62.391	66.323	28.944	2.107	23.928
31	Blue	7	16	1	13.034	13.294	13.945	8.525	11.643		Blue	85.842	97.589	49.595	12.026	42.747
33	Blue	8	17	1	18.457	20.357	22.122	16.619	19.688		Blue	83.825	84.324	47.369	13.656	40.188
35	Blue	7.5	18	1	12.972	15.39	15.417	8.714	12.533		Blue	97.581	99.928	47.649	7.478	40.285
37	Blue	7	19	1	8.279	9.937	12.232	5.621	9.031		Blue	79.309	81.381	39.762	5.822	33.053
39	Blue	8	20	1	14.348	16.025	19.322	14.742	17.015		Blue	92.97	95.66	50.357	11.083	42.461
2	Red	5	1	1	11.83	9.638	11.855	25.463	15.633		Blue	4.147	153.907	5.25	0.568	21.357
4	Red	6	2	1	14.096	16.019	20.253	16.742	18.206		Blue	76.822	85.856	41.336	8.578	35.512
6	Red	6	3	1	13.945	12.446	14.202	21.356	15.933		Blue	54.784	52.493	27.056	7.56	23.079
8	Red	6.5	4	1	11.37	12.196	15.442	15.714	14.585
10	Red	6.5	5	1	17.809	20.846	25.173	25.967	24.429
12	Red	5.5	6	1	14.049	14.939	18.03	19.637	17.772
14	Red	7	7	1	12.806	11.185	12.621	9.127	10.965		Red	17.59	8.628	1.437	68.348	22.968
16	Red	5	8	1	35.556	42.334	45.39	47.755	45.434		Red	11.862	0.026	0.002	65.194	13.476
18	Red	6.5	9	1	7.696	7.492	10.323	10.425	9.371		Red	13.748	5.377	0.761	49.071	15.904
20	Red	6.5	10	1	7.44	7.786	11.312	12.048	10.406		Red	12.059	1.474	0.026	57.745	15.129
22	Red	7	11	1	7.236	7.155	10.24	19.244	12.107		Red	18.396	9.847	3.314	64.511	23.406
24	Red	6	12	1	9.571	10.315	13.799	20.391	14.848		Red	13.564	2.983	0.04	53.116	14.887
26	Red	3.5	13	1	7.109	4.777	7.149	14.478	8.765		Red	12.796	7.741	4.86	23.074	10.628
28	Red	7	14	1	12.443	12.092	16.518	25.913	18.519		Red	36.646	27.979	16.026	94.894	42.607
30	Red	7.5	15	1	9.308	8.896	10.575	16.225	11.598		Red	12.775	0.023	0.004	74.687	15.812
32	Red	6	16	1	11.465	9.145	11.617	24.433	15.007		Red	7.874	0.006	0.01	52.164	10.731
34	Red	7.5	17	1	6.71	6.672	8.986	5.334	6.842		Red	8.755	0.004	0	61.396	12.059
36	Red	7.5	18	1	7.753	6.062	7.907	17.22	10.149		Red	8.446	0.007	0	58.24	12.552
38	Red	8	19	1	8.551	7.179	10.303	15.059	10.962		Red	8.938	0.0005	0.001	53.988	9.494
40	Red	8	20	1	6.655	6.886	10.224	9.465	8.876		Red	12.552	2.314	0.176	49.458	13.974
1	Blue	4.5	1	10	14.425	15.879	18.589	14.591	16.606		Red	9.455	0.352	0.016	51.469	12.031
3	Blue	5	2	10	14.905	15.879	19.002	24.159	19.829		Red	12.55	0.229	0.002	59.971	13.789
5	Blue	5	3	10	22.239	26.861	29.38	24.355	26.916		Red	10.095	0.039	0.00055	60.799	12.996
7	Blue	4.5	4	10	18.376	20.109	22.009	18.374	20.196		Red	7.963	0.156	0.102	54.805	9.884
9	Blue	5	5	10	14.052	16.676	21.913	18.88	19.886		Red	7.889	0.004	0.002	57.99	9.131
11	Blue	5	6	10	20.038	24.815	28.377	24.154	26.079		Red	8.265	0.012	0.004	63.805	12.575
13	Blue	10	7	10	24.94	27.545	28.689	23.752	26.608
15	Blue	4.75	8	10	21.509	22.534	22.759	17.521	20.672
17	Blue	6.5	9	10	14.989	16.267	19.218	12.948	16.197
19	Blue	7	10	10	12.858	15.792	18.586	12.275	15.501
21	Blue	7.5	11	10	10.17	12.426	14.713	7.332	11.293
23	Blue	5	12	10	13.928	17.03	19.368	12.207	16.038
25	Blue	3.5	13	10	14.8	16.798	18.729	11.68	15.707
27	Blue	6.5	14	10	13.273	13.433	15.311	11.709	13.53
29	Blue	8	15	10	15.135	17.974	18.754	12.667	16.032
31	Blue	7	16	10	11.335	13.163	14.322	8.227	11.493
33	Blue	8	17	10	15.026	18.047	21.515	17.12	19.123
35	Blue	7.5	18	10	10.814	12.742	14.085	7.223	10.977
37	Blue	7	19	10	8.702	9.459	11.581	5.512	8.687
39	Blue	8	20	10	10.305	13.084	16.363	10.662	13.428
2	Red	5	1	10	14.023	14.982	18.204	28.545	20.668
4	Red	6	2	10	14.893	15.93	19.119	23.808	19.789
6	Red	6	3	10	16.656	18.734	22.681	24.79	22.451
8	Red	6.5	4	10	13.916	14.236	16.976	17.632	16.433
10	Red	6.5	5	10	15.906	18.33	22.45	32.409	24.593
12	Red	5.5	6	10	15.035	18.257	22.541	23.307	21.804
14	Red	7	7	10	18.744	19.044	21.478	21.839	21.091
16	Red	5	8	10	18.312	18.237	19.309	25.46	20.84
18	Red	6.5	9	10	7.168	5.506	8.236	7.594	7.272
20	Red	6.5	10	10	9.289	7.457	11.487	17.606	12.445
22	Red	7	11	10	5.841	6.23	9.849	14.218	10.126
24	Red	6	12	10	12.491	11.897	14.919	21.709	16.38
26	Red	3.5	13	10	10.92	7.311	11.086	38.297	18.963
28	Red	7	14	10	11.426	11.517	16.451	25.584	18.252
30	Red	7.5	15	10	12.056	13.36	15.695	18.154	15.513
32	Red	6	16	10	18.557	16.608	19.291	31.917	22.725
34	Red	7.5	17	10	6.14	5.883	8.157	4.081	5.854
36	Red	7.5	18	10	6.516	5.995	8.472	12.445	8.814
38	Red	8	19	10	7.803	8.252	12.009	14.598	11.716
40	Red	8	20	10	5.979	6.275	9.278	6.12	7.21
1	Blue	4.5	1	60	12.226	11.791	14.877	11.821	13.32
3	Blue	5	2	60	14.427	12.257	15.346	23.11	17.311
5	Blue	5	3	60	24.868	29.068	29.132	22.124	26.316
7	Blue	4.5	4	60	16.283	17.357	19.153	15.359	17.341
9	Blue	5	5	60	13.333	15.135	18.51	15.256	16.531
11	Blue	5	6	60	22.991	27.187	29.317	25.171	27.278
13	Blue	10	7	60	45.844	59.498	64.983	63.309	63.284
15	Blue	4.75	8	60	42.216	54.475	52.934	53.698	52.674
17	Blue	6.5	9	60	15.285	19.638	22.102	15.6	18.878
19	Blue	7	10	60	11.773	12.795	15.58	10.566	13.171
21	Blue	7.5	11	60	15.822	16.326	18.833	13.956	16.523
23	Blue	5	12	60	10.858	12.134	14.339	8.795	11.692
25	Blue	3.5	13	60	18.364	19.416	21.711	16.241	19.287
27	Blue	6.5	14	60	11.725	13.789	15.679	9.436	12.745
29	Blue	8	15	60	16.773	19.224	17.991	10.625	15.092
31	Blue	7	16	60	11.029	10.247	11.77	7.509	9.728
33	Blue	8	17	60	13.461	17.98	23.074	18.087	20.159
35	Blue	7.5	18	60	14.297	17.633	17.858	10.678	14.808
37	Blue	7	19	60	8.669	10.038	11.812	5.048	8.669
39	Blue	8	20	60	12.082	12.929	16.196	12.272	14.138
2	Red	5	1	60	12.118	12.386	15.63	21.357	16.654
4	Red	6	2	60	13.204	13.416	17.411	14.424	15.81
6	Red	6	3	60	18.257	18.224	21.697	26.312	22.553
8	Red	6.5	4	60	17.817	17.922	20.845	21.334	20.416
10	Red	6.5	5	60	20.904	24.179	28.623	31.228	28.554
12	Red	5.5	6	60	16.52	14.211	18.427	21.03	18.777
14	Red	7	7	60	26.425	31.13	35.08	57.468	41.3
16	Red	5	8	60	28.379	21.227	18.126	54.763	41.016
18	Red	6.5	9	60	6.493	6.084	9.619	7.081	7.992
20	Red	6.5	10	60	8.068	8.251	12.844	18.905	13.623
22	Red	7	11	60	9.255	8.167	11.177	17.1	12.316
24	Red	6	12	60	14.456	15.092	18.555	29.336	21.165
26	Red	3.5	13	60	13.757	9.596	10.837	32.404	17.367
28	Red	7	14	60	14.632	12.47	16.047	29.957	19.784
30	Red	7.5	15	60	7.162	6.418	8.468	10.584	8.33
32	Red	6	16	60	10.545	8.649	10.57	18.793	12.563
34	Red	7.5	17	60	5.75	4.732	7.076	4.253	5.292
36	Red	7.5	18	60	7.513	6.93	9.315	11.345	9.094
38	Red	8	19	60	10.637	10.15	13.726	18.21	14.344
40	Red	8	20	60	8.481	10.806	15.958	13.837	13.949
